# Supplementary material
Source: PubMed Central journal article supplement (PMC4282645)
Supplement: embj0033-2997-sd2.pdf [file embj0033-2997-sd2.pdf]

**Table S1. qPCR Primers table**

| <b>Target</b> | <b>Forward</b>           | <b>Reverse</b>           |
|---------------|--------------------------|--------------------------|
| Gapdh         | ACATCAAGAAGGTGGTGAAGCAGG | ACGAATTTGGCTACAGCAACAGGG |
| Arhgef7       | AGCTCGAGAGACACATGGAGGATT | TCTGCAGCTCAAGCTCTTTCCTCT |
| Ctgf          | GGGCCTCTTCTGCGATTTC      | ATCCAGGCAAGTGCATTGGTA    |
| Ankrd1        | TGCGATGAGTATAAACGGACG    | GTGGATTCAAGCATATCTCGGAA  |
| Cyr61         | CGAGGTGGAGTTGACGAGAAACAA | CTTTGAGCACTGGGACCATGAAGT |
| Cdc42         | CCCATCGGAATATGTACCAACTG  | CGGTCGTAGTCTGTCATAATCCT  |
| Rac1          | GAGACGGAGCTGTTGGTAAAA    | ATAGGCCAGATTCACTGGTT     |
| Lats1         | TGCCAGGCCTATTAATGCCACCAT | TGCTTGGGTGAGCTTGAGCAAATG |
| Lats2         | TTTATCCACCGGGACATCAAGCCT | AGTTGGAAACATCGTCCCAGAGGT |
