# Supplementary material
Source: PubMed Central journal article supplement (PMC4282645)

**Figure 1B**

**Flag-TAZ/HA-βPIX**

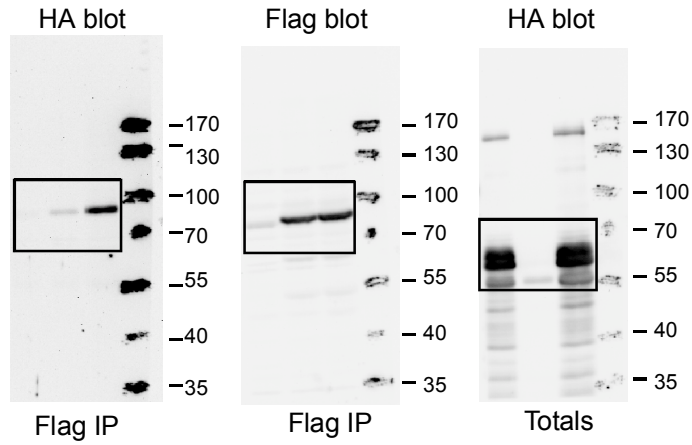

**Flag-βPIX/HA-TAZ**

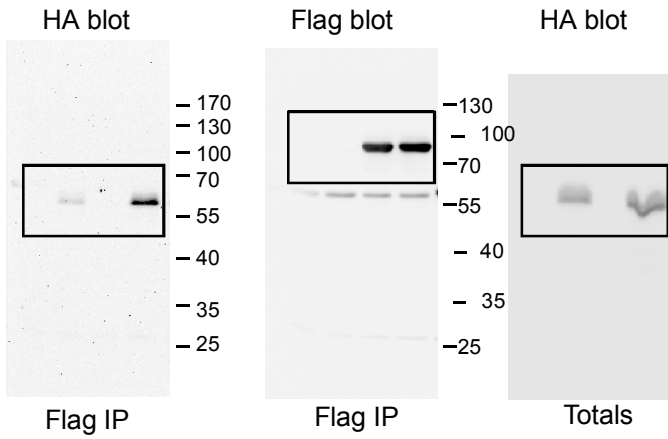

**Flag-βPIX/HA-YAP**

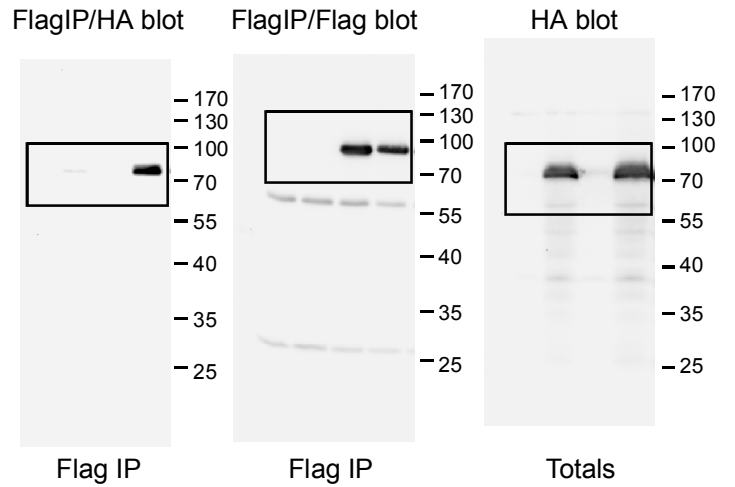

Supplement: embj0033-2997-sd4.pdf [file embj0033-2997-sd4.pdf]

**Figure 5**

**B**

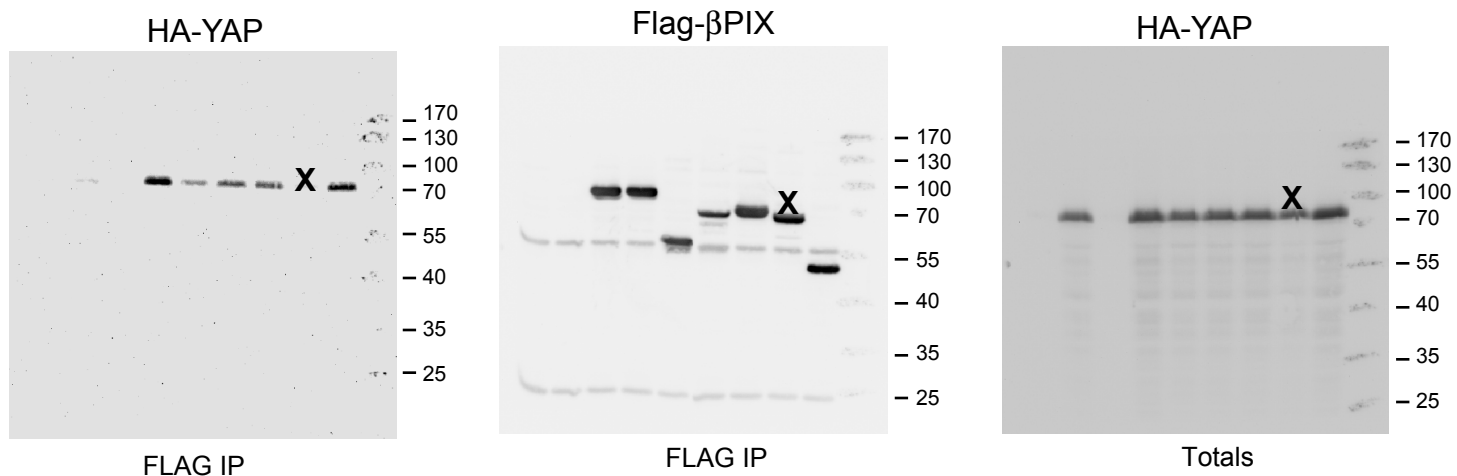

**C**

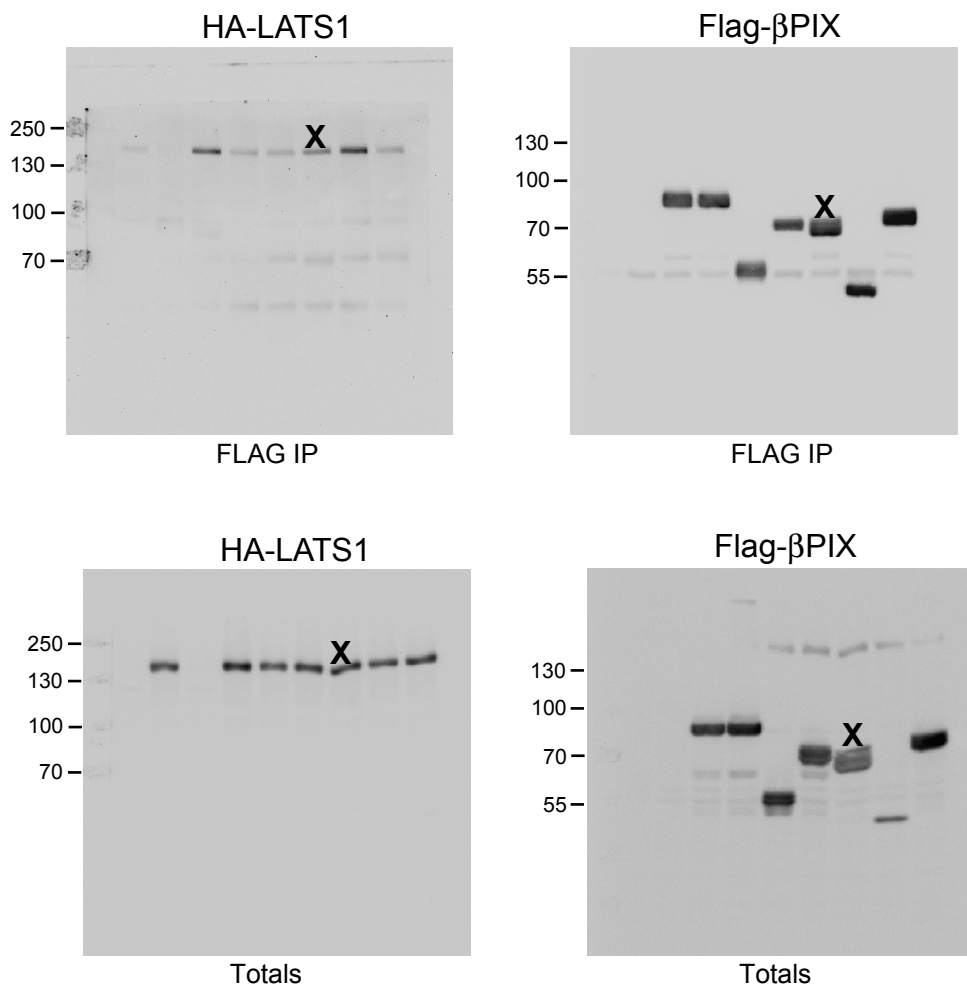

Supplement: embj0033-2997-sd5.pdf [file embj0033-2997-sd5.pdf]

**Figure 6**

**B**

**IP Blots**

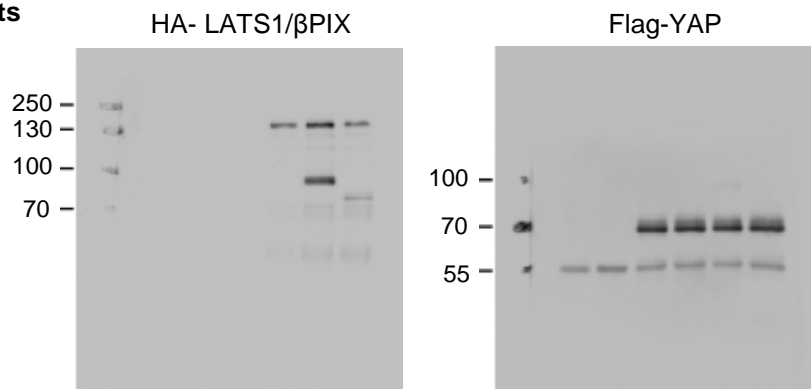

**Total Blots**

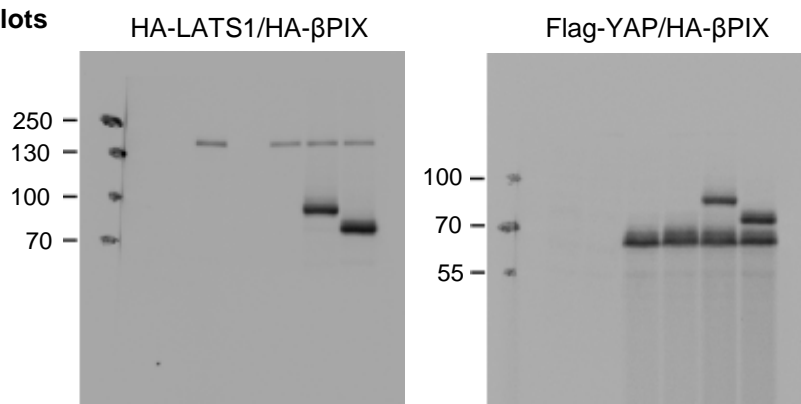

**C**

**IP Blots**

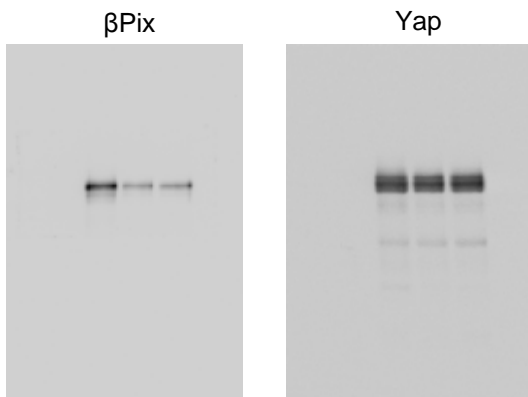

**Total Blots**

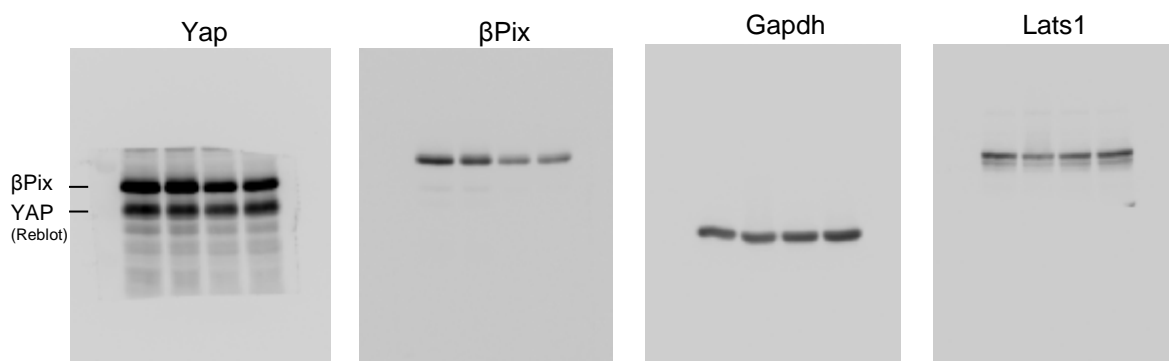

Supplement: embj0033-2997-sd6.pdf [file embj0033-2997-sd6.pdf]
